# Supplementary material for: Visible light active photocatalysis on block copolymer induced strings of ZnO nanoparticles doped with carbon
Source: Royal Society of Chemistry journal article supplement (doi:10.1039/c2ta00263a), 2012-10-30
Supplement: c2ta00263a.pdf [file c2ta00263a.pdf]

Supporting Information

## Visible light active photocatalysis on block copolymer induced strings of ZnO nanoparticles doped with carbon

Saji Thomas Kochuveedu, Yoon Hee Jang, Yu Jin Jang and Dong Ha Kim\*

*Department of Chemistry and Nano Science, Division of Molecular and Life Sciences, College of Natural Sciences, Ewha Womans University, 52, Ewhayeodae-gil, Seodaemun-gu, Seoul, Korea.*

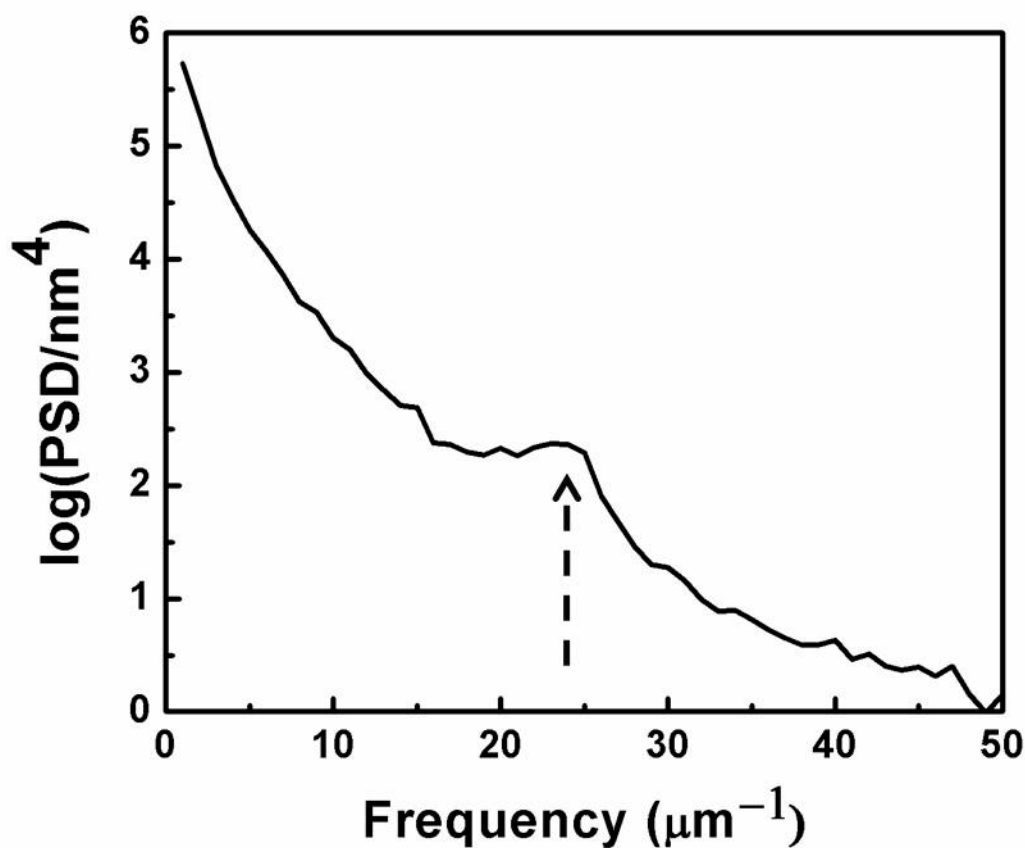

**Fig. S1.** Power spectral density calculated from the AFM image in figure 1b. The first order peak is distinctly observed, indicating that the nanowires are regularly spaced with a periodicity of  $\sim 24$  nm.

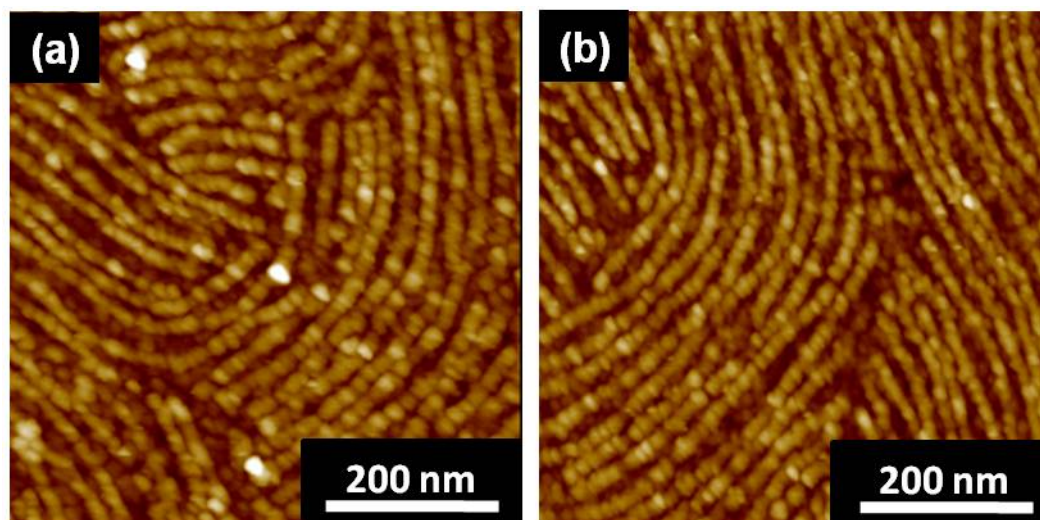

**Fig. S2.** AFM image of carbonized ZnO film on Quartz (a) and ITO (b). The morphology remains same as that of C-ZnO on Si substrate.

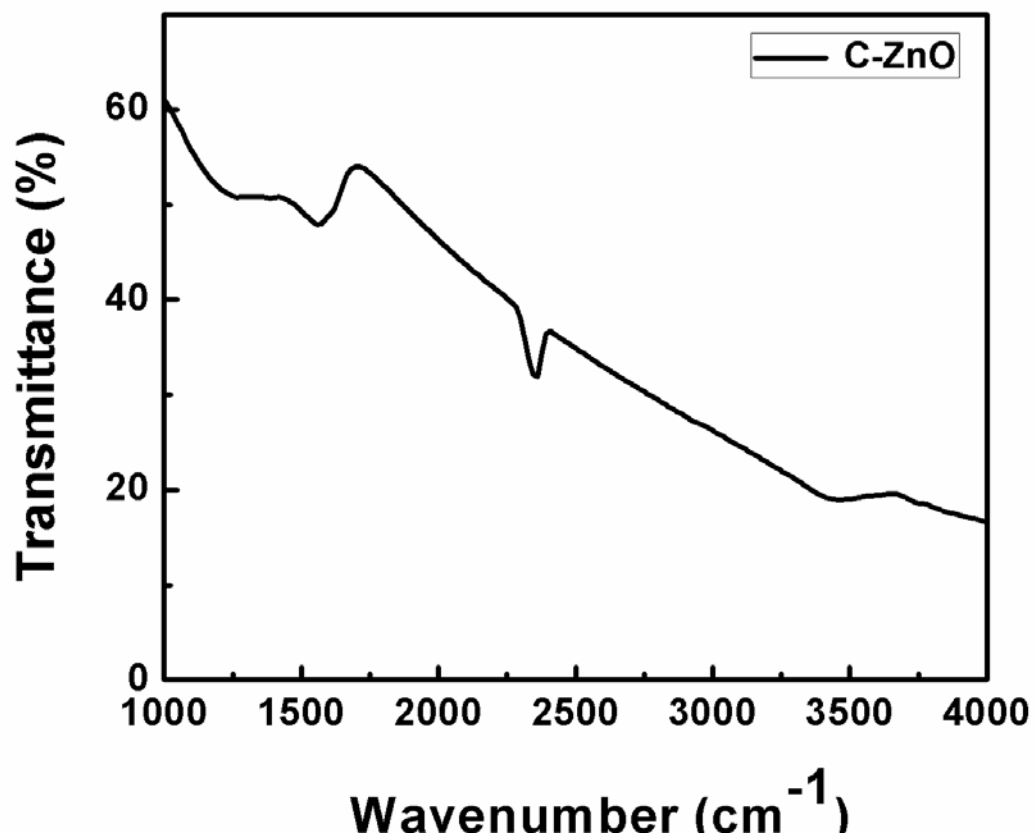

**Fig. S3.** FTIR profile C-ZnO showing the presence of surface hydroxyl groups at 3500 cm<sup>-1</sup>.

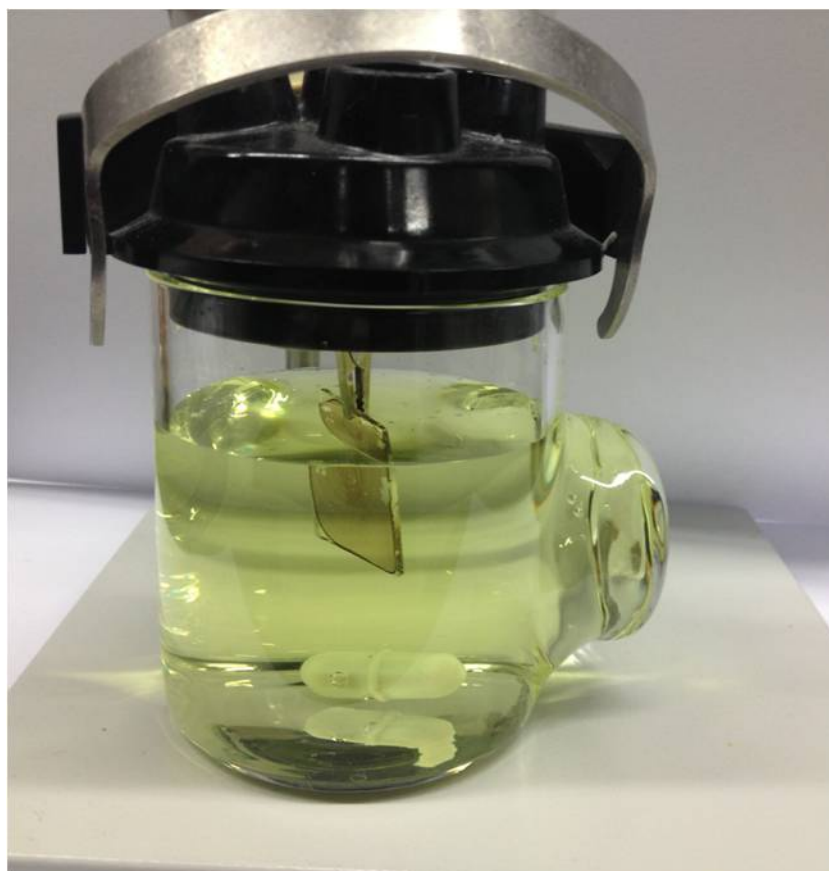

**Fig. S4.** Experimental setup for photocatalysis. C-ZnO film on Quartz substrate is suspended in PNP solution in quartz container. The experiment was conducted under stirring and the set up was exposed to light through the flattened window

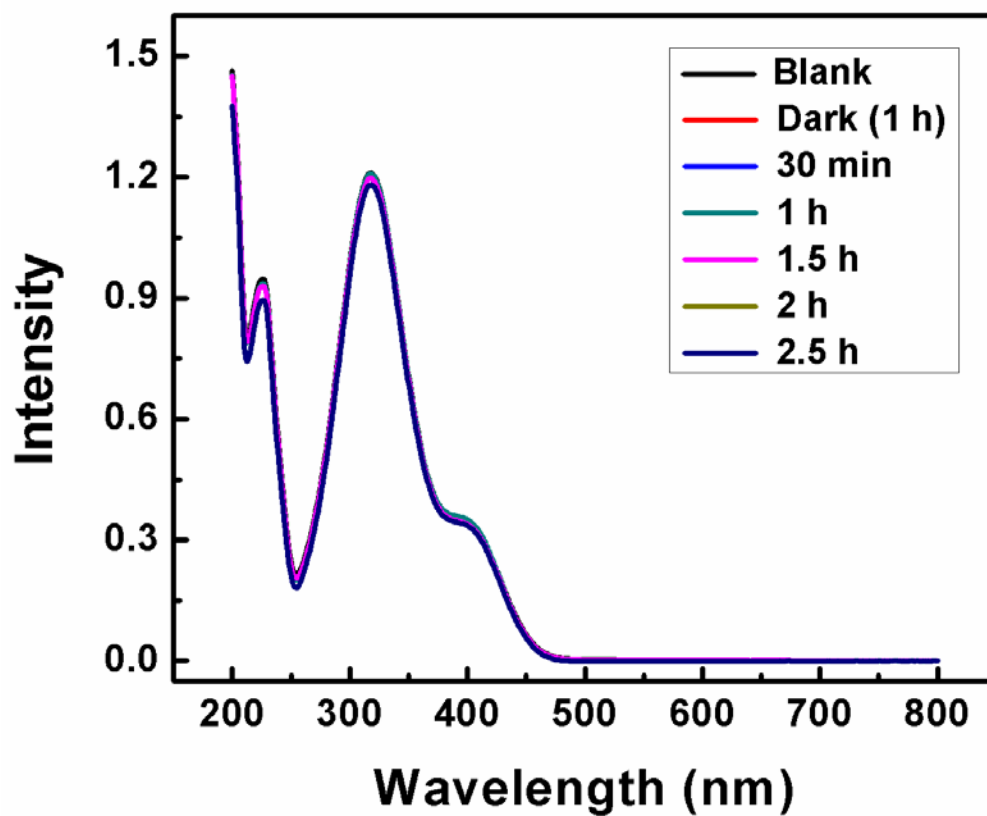

**Fig. S5.** Absorption profile for the photodegradation of PNP without catalyst.

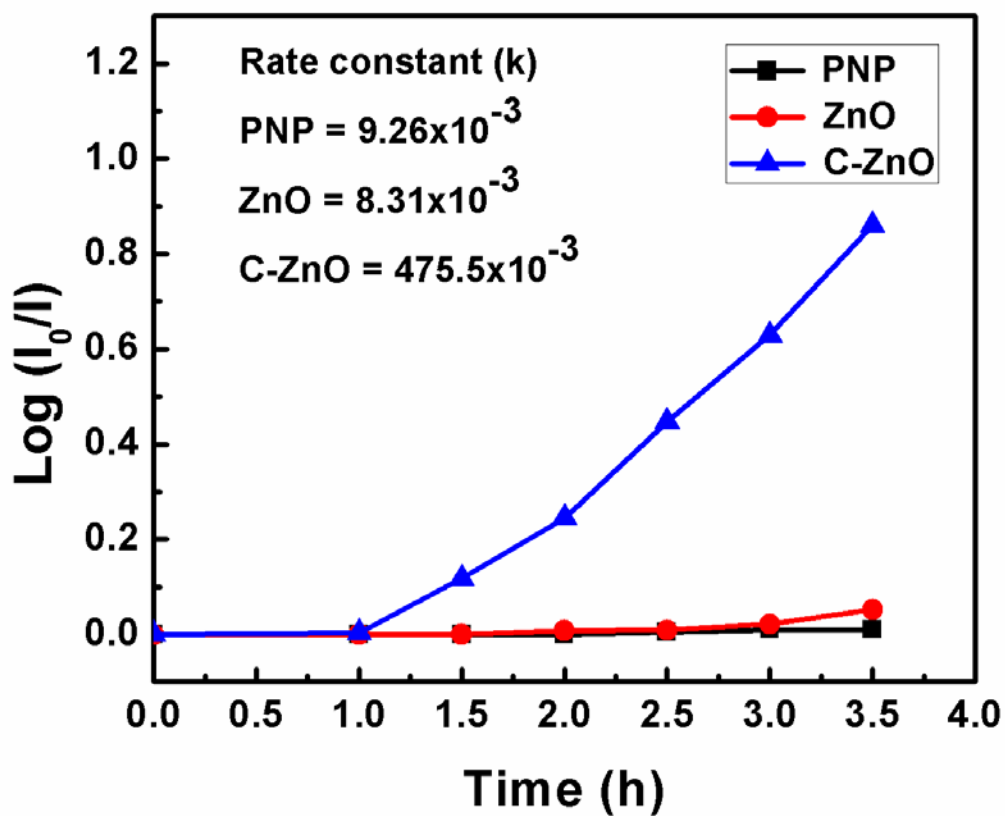

**Fig. S6.** The plot of  $\log(I_0/I)$  at 320 nm versus time. The slope of the straight line gives the rate constant of the photocatalytic reaction.
